# Supplementary material
Source: PubMed Central journal article supplement (PMC5699887)
Supplement: NIHMS920616-supplement-Supplemental_Methods.pdf [file NIHMS920616-supplement-Supplemental_Methods.pdf]

## **Supplemental Materials and Methods**

### ***Histochemistry and immunohistochemistry***

TMJs were decalcified, embedded in paraffin, and cut sagittally into 5µm-thick sections. The most central sagittal sections of each joint were selected for safranin O (Sigma-Aldrich, St. Louis, USA, S2255) and immunohistochemical staining with antibodies for MGP (Santa Cruz, Dallas, USA, sc-66965), type II (Col-II, Santa Cruz, sc-52658) and type X (Col-X, Abcam, Cambridge, UK, ab58632) collagen, peroxidase-conjugated goat anti-rabbit IgG (Zhongshan Jinqiao Biotech, Beijing, China, SP-9001), and DAB substrate (Cowin Biotech, Beijing, China, CW0125). For negative controls, non-immune goat serum was substituted for the primary antibody.

### ***RNA extraction and real-time PCR***

Total RNA was extracted from condylar cartilage using the RNeasy Fibrous Tissue Midi Kit (QIAGEN, Hilden, Germany) and purified by the RNeasy mini kit (QIAGEN, Valencia, CA, USA), reverse-transcribed into cDNA, and amplified by a Applied Biosystems 7500 thermocycler using custom-made primers (**Supplemental Table.1**). Each sample was analyzed for three times and the mean values were calculated. The amount of target cDNA, relative to GAPDH, was calculated using the formula  $2^{-\Delta\Delta Ct}$ . The results were presented as the relative quantification of the target gene normalized to the 2-week control group.

### ***Synthesis of BCP and CPPD crystals***

BCP was synthesized as described previously [1]. Briefly, 50 ml 0.2 M NaPi (pH 6.7) was added to 42 ml 0.2 M CaCl<sub>2</sub> and stirred for 1 h at room temperature. The resulting crystals were collected by centrifugation at 3000 rpm, washed with H<sub>2</sub>O, resuspended in 6.7 ml H<sub>2</sub>O, and added to 67ml of 0.5 M HCl. The pH of the mixture was adjusted to between 8.5 and 10 and stirred overnight. The BCP crystals were then washed with H<sub>2</sub>O, sterilized with 70% ethanol and freeze dried.

Polymorphs of CPPD were synthesized using methods described by Cheng and Pritzker [2]. Briefly, a liter of mixture containing 1 mM CaCl<sub>2</sub>, 0.8 mM MgCl<sub>2</sub>, 0.34 mM NaPPi, and 140 mM NaCl (pH 7.4) was prepared and shaken at 37°C for 3 weeks. The precipitates were collected by centrifugation at 3000 rpm, washed with H<sub>2</sub>O, sterilized in 70% ethanol and freeze dried.

## References

1. McCarthy GM, Cheung HS, Abel SM, Ryan LM. Basic calcium phosphate crystal-induced collagenase production: role of intracellular crystal dissolution. *Osteoarthritis Cartilage* 1998;6:205-13.
2. Cheng PT, Pritzker KP. The effect of calcium and magnesium ions on calcium pyrophosphate crystal formation in aqueous solutions. *J Rheumatol* 1981;8:772-82.
