# Supplementary material
Source: PubMed Central journal article supplement (PMC5699887)
Supplement: NIHMS920616-supplement-Supplemental_Table.pdf [file NIHMS920616-supplement-Supplemental_Table.pdf]

## Supplemental Table.1

### Gene primers

| Genes                                 | Forward primer           | Reverse primer            |
|---------------------------------------|--------------------------|---------------------------|
| <i>Mgp</i> (rat)                      | CAGCAGAGGTGGCGAGCTAA     | ATGGCGTAGCGCTCACACAG      |
| <i>Ank</i> (rat)                      | CTTCGTCTGCATGGCACTGTC    | TTCTGCAAAGGCGAAGTCCAC     |
| <i>Npp1</i> (rat)                     | AGGGCATTACACGGACCA       | CTTCAGGCCATCCATCAGCA      |
| <i>Tnap</i> (rat)                     | CACGTTGACTGTGGTTACTGCTGA | CCTTGTAACCAGGCCCGTTG      |
| <i>CD73</i> (rat)                     | GGGCTATCTGAAGGTTGAGTTTGA | CACTGGTTAATGTCTGCTTTGATGG |
| <i>Mmp13</i> (rat)                    | GCAGCTCCAAAGGCTACAA      | CATCATCTGGGAGCATGAAA      |
| <i>Col2a1</i> (rat)                   | CGCCACGGTCCTACAATGTC     | GTCACCTCTGGGTCCTTGTTAC    |
| <i>Col10a1</i> (rat)                  | CAGCCAAGCAGTCATAACC      | AGTGCTGCTGCCTGTTGT        |
| <i>Aggrecan</i> (rat)                 | TGGCATTGAGGACAGCGAAG     | TCCAGTGTGTAGCGTGTGGAAATAG |
| <i>Gapdh</i> (rat)                    | GGCACAGTCAAGGCTGAGAATG   | ATGGTGGTGAAGACGCCAGTA     |
| <i>Il-1<math>\beta</math></i> (mouse) | CTTCGTAAATGACCTGCAGCTTG  | AGGTCGGTCTCACTACCTGTGATG  |
| <i>Tnf-a</i> (mouse)                  | AACTCGAGTGACAAGCCCGTAG   | GTACCACCAGTTGGTTGTCTTTGA  |
| <i>Mmp3</i> (mouse)                   | TCTTTCACCTCAGCCAATGCT    | GGGAGGTCCATAGAGGGATT      |
| <i>Mmp9</i> (mouse)                   | AGCCGGGAACGTATCTGGA      | TGGAAACTCACACGCCAGAAG     |
| <i>Mmp13</i> (mouse)                  | TCCCTGGAATTGGCAACAAAG    | GCATGACTCTCACAATGCGATTAC  |
| <i>Adamts5</i> (mouse)                | AAGGGCACAGGCTACTATGTGGTC | CAATAATGCCGTCACATCCAGTTC  |
| <i>Col2a1</i> (mouse)                 | CATCCAGGGCTCCAATGATGTA   | ATGTCCATGGGTGCGATGTC      |
| <i>Col10a1</i> (mouse)                | GTTCTTGACCCTGGTTCA       | CTGAGGGACCTGGGTGT         |
| <i>Aggrecan</i> (mouse)               | TTCCACCAGTGCGATGCAG      | TGGTGTCCCGGATTCCGTA       |

*Gapdh* (mouse)

TGTGTCCGTCGTGGATCTGA

TTGCTGTTGAAGTCGCAGGAG

---
